# Supplementary material
Source: PubMed Central journal article supplement (PMC3232301)
Supplement: NIHMS339216-supplement-1_si_001.pdf [file NIHMS339216-supplement-1_si_001.pdf]

Supporting Information of “Cosolute Paramagnetic Relaxation Enhancements Detect Transient Conformations of Human Uracil DNA Glycosylase (hUNG)” by Yan Sun, Joshua I. Friedman and James T. Stivers

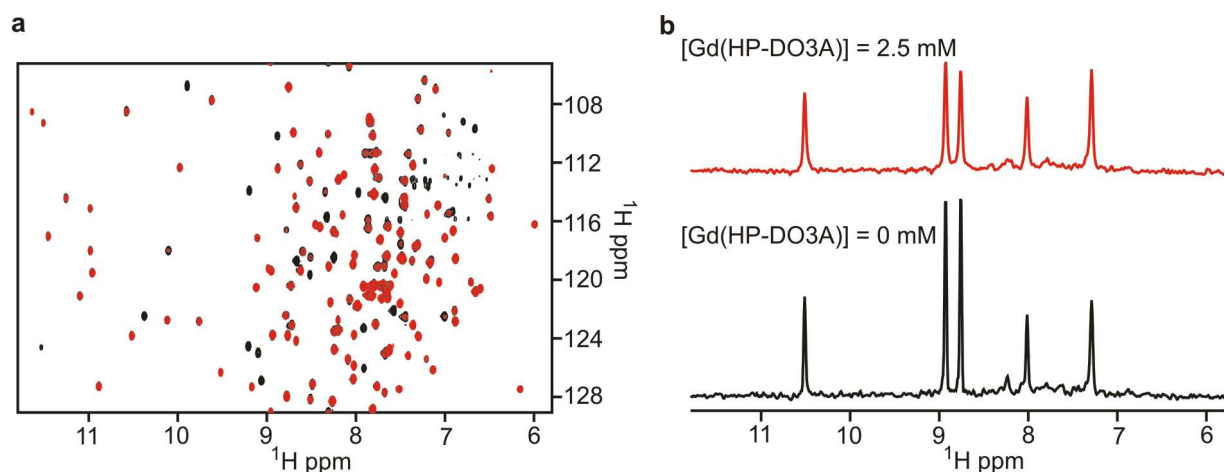

**Figure S1.** The  $^1\text{H}$ - $^{15}\text{N}$  TROSY spectra of DNA-bound hUNG and the effect of the Gd(HP-DO3A) paramagnetic cosolute. (a) The spectra were obtained with isotopically  $^2\text{H}$ ,  $^{15}\text{N}$ -enriched hUNG-DNA complex samples with no Gd(HP-DO3A) (black) or  $[\text{Gd}(\text{HP-DO3A})] = 2.5 \text{ mM}$  (red). (b) Representative 1D slices ( $f_1 = 123.8 \text{ ppm}$ ) of the spectra in (a).

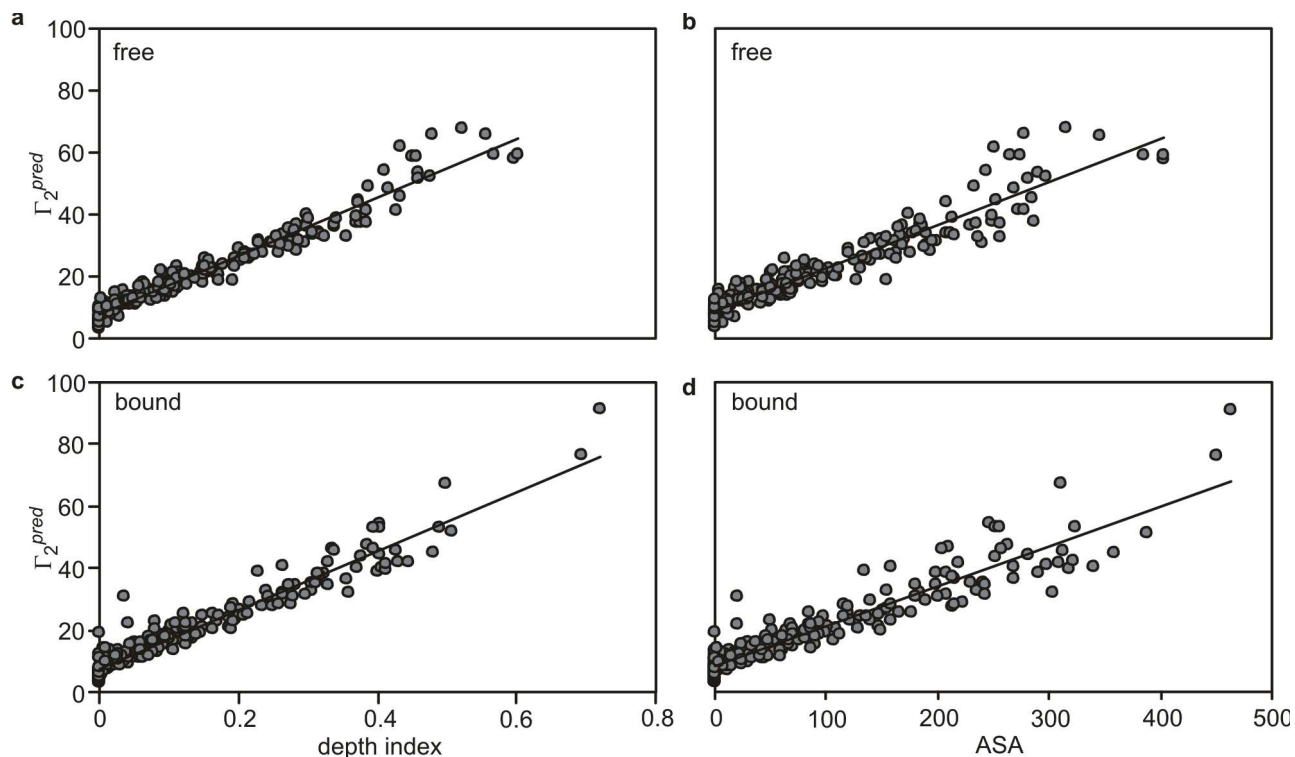

**Figure S2.** The predicted PRE values ( $\Gamma_2^{pred}$ ) as a function of calculated depth index for (a) free and (c) DNA-bound hUNG, and the predicted PRE values ( $\Gamma_2^{pred}$ ) as a function of accessible surface areas (ASA) for both the (b) free hUNG and (d) its complex with non-target DNA. The radius for the sample sphere centered on each amide was 10 and 9 Å in the calculations for the depth index and ASA, respectively.

**Table S1.** Summary of experimentally measured and calculated parameters for hUNG backbone amides.

| Res. | amino acid | $\Gamma_2^{\text{Meas}'} (\text{s}^{-1} \text{mM}^{-1})^a$ |       |           |       | $\Gamma_2^{\text{Pred}'} (\times 10^{-4})^e$ |           | $\Delta\delta^f$ (ppm) | NMA <sup>g</sup> (arb. u.) | $k_{\text{ex}}^h$ ( $\text{s}^{-1}$ ) | depth index <sup>i</sup> |           | ASA <sup>j</sup> |           |
|------|------------|------------------------------------------------------------|-------|-----------|-------|----------------------------------------------|-----------|------------------------|----------------------------|---------------------------------------|--------------------------|-----------|------------------|-----------|
|      |            | free                                                       | error | DNA-bound | error | free                                         | DNA-bound |                        |                            |                                       | free                     | DNA-bound | free             | DNA-bound |
| 84   | Phe        | 57.62                                                      | 2.94  | 59.44     | 5.85  | 61.95                                        | 32.51     | 0.011                  | 0.211                      | N/A                                   | 0.434                    | 0.306     | 251.5            | 234.9     |
| 85   | Phe        | 29.06                                                      | 2.17  | 27.62     | 0.53  | 28.83                                        | 18.82     | 0.015                  | 0.214                      | N/A                                   | 0.202                    | 0.092     | 119.6            | 62.4      |
| 86   | Gly        | 28.92                                                      | 2.54  | 32.05     | 4.36  | 15.13                                        | 11.18     | 0.004                  | 0.24                       | N/A                                   | 0.079                    | 0.023     | 46.1             | 16.6      |
| 87   | Glu        | 70                                                         | 0     | 70        | 0     | 54.09                                        | 38.86     | 0.005                  | 0.317                      | N/A                                   | 0.41                     | 0.227     | 243.5            | 134.6     |
| 88   | Ser        | n. a. <sup>b</sup>                                         | n. a. | n. a.     | n. a. | 36.86                                        | 29.20     | n. a.                  | 0.348                      | N/A                                   | 0.297                    | 0.215     | 184.0            | 139.3     |
| 89   | Trp        | 29.11                                                      | 1.28  | 27.41     | 5.27  | 15.77                                        | 14.48     | 0.006                  | 0.338                      | N/A                                   | 0.059                    | 0.049     | 34.0             | 34.2      |
| 90   | Lys        | 19.52                                                      | 1.19  | 15.16     | 1.27  | 15.44                                        | 13.38     | 0.004                  | 0.302                      | N/A                                   | 0.033                    | 0.016     | 4.4              | 1.6       |
| 91   | Lys        | 17.53                                                      | 1.04  | 14.7      | 0.8   | 24.28                                        | 24.46     | 0.009                  | 0.346                      | N/A                                   | 0.152                    | 0.148     | 80.2             | 96.7      |
| 92   | His        | 12.49                                                      | 1.2   | 17.58     | 3.05  | 20.74                                        | 18.91     | 0.008                  | 0.371                      | N/A                                   | 0.124                    | 0.103     | 76.9             | 79.9      |
| 93   | Leu        | 8.66                                                       | 0.31  | 12.8      | 1.18  | 17.60                                        | 20.36     | 0.006                  | 0.316                      | N/A                                   | 0.091                    | 0.142     | 50.6             | 108.3     |
| 94   | Ser        | 11.46                                                      | 1     | 13.74     | 0.72  | 30.32                                        | 25.36     | 0.007                  | 0.293                      | N/A                                   | 0.27                     | 0.207     | 189.8            | 165.4     |
| 95   | Gly        | 13.58                                                      | 0.41  | 13.86     | 0.49  | 53.76                                        | 43.52     | 0.009                  | 0.403                      | N/A                                   | 0.459                    | 0.377     | 290.2            | 252.5     |
| 96   | Glu        | 7.79                                                       | 0.31  | 11.57     | 1.17  | 27.26                                        | 26.39     | 0.006                  | 0.38                       | N/A                                   | 0.215                    | 0.2       | 148.9            | 150.4     |
| 97   | Phe        | 7.86                                                       | 0.62  | 9.23      | 0.43  | 25.55                                        | 28.62     | 0.005                  | 0.357                      | N/A                                   | 0.214                    | 0.277     | 134.0            | 222.8     |
| 98   | Gly        | 11.83                                                      | 0.89  | 10.96     | 0.86  | 51.45                                        | 52.91     | 0.008                  | 0.563                      | N/A                                   | 0.458                    | 0.49      | 281.6            | 323.7     |
| 99   | Lys        | 7.37                                                       | 0.4   | 10.15     | 0.98  | 36.39                                        | 44.38     | 0.007                  | 0.475                      | N/A                                   | 0.337                    | 0.403     | 229.2            | 281.9     |
| 100  | Pro        | — <sup>c</sup>                                             | —     | —         | —     | —                                            | —         | —                      | 0.376                      | —                                     | 0.596                    | 0.507     | 404.0            | 387.5     |
| 101  | Tyr        | 14.03                                                      | 0.23  | 14.34     | 0.39  | 58.95                                        | 47.32     | 0.004                  | 0.282                      | N/A                                   | 0.451                    | 0.384     | 264.4            | 262.6     |
| 102  | Phe        | 4.99                                                       | 0.54  | 15.12     | 1.39  | 23.40                                        | 23.01     | 0.005                  | 0.316                      | N/A                                   | 0.111                    | 0.08      | 76.9             | 49.2      |
| 103  | Ile        | 6.81                                                       | 1.03  | 9.35      | 0.65  | 25.64                                        | 28.03     | 0.004                  | 0.529                      | N/A                                   | 0.153                    | 0.193     | 62.5             | 114.9     |
| 104  | Lys        | 7.58                                                       | 0.37  | 8.55      | 0.47  | 31.78                                        | 31.86     | 0.02                   | 0.709                      | N/A                                   | 0.276                    | 0.264     | 170.0            | 184.2     |
| 105  | Leu        | 4.76                                                       | 0.01  | 7.31      | 0.74  | 21.16                                        | 19.77     | 0                      | 0.68                       | N/A                                   | 0.116                    | 0.1       | 66.9             | 64.7      |
| 106  | Met        | n. o. <sup>d</sup>                                         | n. o  | n. o      | n. o  | 19.01                                        | 19.70     | n. o                   | 0.765                      | N/A                                   | 0.108                    | 0.127     | 65.8             | 94.8      |
| 107  | Gly        | 12.18                                                      | 0.93  | 12.08     | 0.97  | 36.43                                        | 36.45     | 0.007                  | 1.155                      | N/A                                   | 0.297                    | 0.315     | 185.5            | 214.9     |
| 108  | Phe        | 10.64                                                      | 0.49  | 13.16     | 0.82  | 31.83                                        | 32.62     | 0.005                  | 1.376                      | N/A                                   | 0.23                     | 0.239     | 140.4            | 154.7     |
| 109  | Val        | n. o                                                       | n. o  | n. o      | n. o  | 16.22                                        | 15.56     | n. o                   | 1.214                      | N/A                                   | 0.069                    | 0.068     | 30.8             | 40.5      |
| 110  | Ala        | n. o                                                       | n. o  | n. o      | n. o  | 24.94                                        | 26.64     | n. o                   | 1.527                      | N/A                                   | 0.196                    | 0.2       | 140.4            | 154.1     |
| 111  | Glu        | 13.7                                                       | 0.33  | 14.33     | 0.36  | 31.57                                        | 30.99     | 0.008                  | 2.042                      | N/A                                   | 0.278                    | 0.263     | 198.9            | 207.2     |
| 112  | Glu        | n. o                                                       | n. o  | n. o      | n. o  | 21.56                                        | 20.08     | n. o                   | 1.86                       | N/A                                   | 0.091                    | 0.079     | 50.5             | 52.4      |
| 113  | Arg        | 13.71                                                      | 0.26  | 14.19     | 0.73  | 21.30                                        | 21.25     | 0.012                  | 1.69                       | N/A                                   | 0.107                    | 0.103     | 62.5             | 68.1      |
| 114  | Lys        | n. o                                                       | n. o  | n. o      | n. o  | 33.88                                        | 34.73     | n. o                   | 2.283                      | N/A                                   | 0.279                    | 0.281     | 176.8            | 198.8     |
| 115  | His        | n. o                                                       | n. o  | n. o      | n. o  | 37.04                                        | 35.30     | n. o                   | 2.532                      | N/A                                   | 0.339                    | 0.305     | 234.2            | 240.5     |
| 116  | Tyr        | 60.1                                                       | 7     | 55.59     | 0.7   | 33.74                                        | 35.01     | 0.007                  | 2.096                      | N/A                                   | 0.308                    | 0.311     | 207.5            | 229.4     |
| 117  | Thr        | 70                                                         | 0.05  | 70        | 0     | 48.63                                        | 45.89     | 0.007                  | 1.532                      | N/A                                   | 0.417                    | 0.395     | 268.5            | 256.5     |
| 118  | Val        | 28.97                                                      | 1.81  | 40.97     | 5.14  | 27.81                                        | 24.08     | 0.013                  | 0.923                      | N/A                                   | 0.208                    | 0.188     | 120.7            | 130.8     |
| 119  | Tyr        | n. o                                                       | n. o  | n. o      | n. o  | 9.74                                         | 8.58      | n. o                   | 0.5                        | N/A                                   | 0.008                    | 0.002     | 1.1              | 0.0       |
| 120  | Pro        | —                                                          | —     | —         | —     | —                                            | —         | —                      | 0.176                      | N/A                                   | 0.028                    | 0.037     | 9.9              | 26.0      |
| 121  | Pro        | —                                                          | —     | —         | —     | —                                            | —         | —                      | 0.254                      | N/A                                   | 0.256                    | 0.235     | 148.2            | 158.1     |
| 122  | Pro        | —                                                          | —     | —         | —     | —                                            | —         | —                      | 0.496                      | N/A                                   | 0.148                    | 0.187     | 109.8            | 146.2     |
| 123  | His        | n. o                                                       | n. o  | n. o      | n. o  | 37.65                                        | 38.77     | n. o                   | 0.487                      | N/A                                   | 0.37                     | 0.399     | 249.8            | 289.6     |
| 124  | Gln        | 12.73                                                      | 0.65  | 14.26     | 0.49  | 16.63                                        | 17.42     | 0.007                  | 0.317                      | N/A                                   | 0.085                    | 0.134     | 17.6             | 79.7      |
| 125  | Val        | 8.05                                                       | 0.72  | 7.55      | 0.63  | 10.06                                        | 10.15     | 0.006                  | 0.166                      | N/A                                   | 0.003                    | 0.002     | 1.1              | 0.0       |
| 126  | Phe        | 7.33                                                       | 0.1   | 8.48      | 0.55  | 8.94                                         | 8.57      | 0.011                  | 0.205                      | N/A                                   | 0.001                    | 0.005     | 0.0              | 0.0       |
| 127  | Thr        | 7.15                                                       | 0.54  | 7.81      | 0.6   | 7.44                                         | 7.26      | 0.006                  | 0.302                      | N/A                                   | 0.007                    | 0.01      | 1.1              | 3.2       |
| 128  | Trp        | 4.17                                                       | 0.1   | 5.88      | 0.34  | 5.96                                         | 5.48      | 0.006                  | 0.338                      | N/A                                   | 0                        | 0         | 0.0              | 0.0       |
| 129  | Thr        | 29.93                                                      | 1.8   | 52.14     | 6.56  | 7.53                                         | 6.77      | 0                      | 0.347                      | N/A                                   | 0.002                    | 0.004     | 0.0              | 0.0       |
| 130  | Gln        | 19.92                                                      | 1.39  | 25.79     | 3.68  | 12.00                                        | 9.48      | 0.002                  | 0.283                      | N/A                                   | 0.074                    | 0.04      | 48.3             | 29.7      |
| 131  | Met        | 27.9                                                       | 0.63  | 27.85     | 2.82  | 13.59                                        | 13.23     | 0.003                  | 0.351                      | N/A                                   | 0.096                    | 0.084     | 63.7             | 60.8      |

| Res. | amino acid | $\Gamma_2^{\text{Meas}'}$ ( $\text{s}^{-1} \text{mM}^{-1}$ ) |       |           |       | $\Gamma_2^{\text{Pred}'}$ ( $\times 10^{-4}$ ) |           | $\Delta\delta$ (ppm) | NMA (arb. u.) | $k_{\text{ex}}$ ( $\text{s}^{-1}$ ) | depth index |           | ASA   |           |
|------|------------|--------------------------------------------------------------|-------|-----------|-------|------------------------------------------------|-----------|----------------------|---------------|-------------------------------------|-------------|-----------|-------|-----------|
|      |            | free                                                         | error | DNA-bound | error | free                                           | DNA-bound |                      |               |                                     | free        | DNA-bound | free  | DNA-bound |
| 132  | Cys        | 28.52                                                        | 1.6   | 28.87     | 1.8   | 16.01                                          | 14.81     | 0.004                | 0.296         | N/A                                 | 0.112       | 0.105     | 70.3  | 69.5      |
| 133  | Asp        | 30.94                                                        | 4.19  | 61.33     | 9.06  | 40.32                                          | 54.26     | 0.006                | 0.319         | N/A                                 | 0.297       | 0.402     | 174.5 | 245.5     |
| 134  | Ile        | 15.87                                                        | 1.53  | 28.77     | 1.83  | 16.33                                          | 16.48     | 0.01                 | 0.387         | N/A                                 | 0.088       | 0.118     | 51.6  | 107.3     |
| 135  | Lys        | 15.24                                                        | 1.04  | 27.29     | 1.75  | 21.16                                          | 23.35     | 0.007                | 0.389         | N/A                                 | 0.156       | 0.195     | 83.1  | 140.2     |
| 136  | Asp        | 16.6                                                         | 2.18  | 26.17     | 2.12  | 16.75                                          | 20.15     | 0.006                | 0.397         | N/A                                 | 0.115       | 0.19      | 51.4  | 148.8     |
| 137  | Val        | 12.35                                                        | 0.56  | 12.95     | 1.28  | 11.27                                          | 12.42     | 0.005                | 0.408         | N/A                                 | 0.025       | 0.045     | 13.8  | 32.1      |
| 138  | Lys        | 5.33                                                         | 0.09  | 6.16      | 0.43  | 6.68                                           | 7.64      | 0.006                | 0.479         | N/A                                 | 0.001       | 0.007     | 0.0   | 2.6       |
| 139  | Val        | n. o                                                         | n. o  | n. o      | n. o  | 5.72                                           | 5.94      | n. o                 | 0.361         | N/A                                 | 0           | 0         | 0.0   | 0.0       |
| 140  | Val        | n. o                                                         | n. o  | n. o      | n. o  | 4.49                                           | 4.35      | n. o                 | 0.369         | N/A                                 | 0           | 0         | 0.0   | 0.0       |
| 141  | Ile        | n. o                                                         | n. o  | n. o      | n. o  | 3.57                                           | 3.61      | n. o                 | 0.415         | N/A                                 | 0           | 0         | 0.0   | 0.0       |
| 142  | Leu        | n. o                                                         | n. o  | n. o      | n. o  | 4.58                                           | 3.67      | n. o                 | 0.588         | N/A                                 | 0           | 0         | 0.0   | 0.0       |
| 143  | Gly        | 11.33                                                        | 0.33  | 9.26      | 0.45  | 4.05                                           | 3.22      | 0.023                | 0.565         | N/A                                 | 0           | 0         | 0.0   | 0.0       |
| 144  | Gln        | 56.8                                                         | 1.83  | 50.24     | 9.78  | 7.02                                           | 3.30      | 0.024                | 0.74          | 900                                 | 0.028       | 0         | 17.5  | 0.0       |
| 145  | Asp        | 70                                                           | 2.82  | 54.44     | 2.65  | 11.05                                          | 3.47      | 0.013                | 0.666         | 900                                 | 0.053       | 0         | 28.7  | 0.0       |
| 146  | Pro        | —                                                            | —     | —         | —     | —                                              | —         | —                    | 0.6           | N/A                                 | 0.011       | 0         | 5.5   | 0.0       |
| 147  | Tyr        | 9.58                                                         | 0.2   | 11.77     | 0.83  | 7.47                                           | 4.29      | 0.023                | 0.608         | N/A                                 | 0.017       | 0         | 13.2  | 0.0       |
| 148  | His        | 26.36                                                        | 1.77  | 17.77     | 3.55  | 18.32                                          | 7.02      | 0.015                | 0.889         | 900                                 | 0.148       | 0.003     | 96.6  | 0.0       |
| 149  | Gly        | 15.23                                                        | 1.03  | 15.94     | 2.38  | 20.65                                          | 10.70     | 0.024                | 0.86          | N/A                                 | 0.169       | 0.029     | 107.5 | 21.8      |
| 150  | Pro        | —                                                            | —     | —         | —     | —                                              | —         | —                    | 0.607         | N/A                                 | 0.314       | 0.329     | 211.6 | 242.3     |
| 151  | Asn        | 13.97                                                        | 0.16  | 13.89     | 0.42  | 27.97                                          | 41.61     | 0.002                | 0.394         | N/A                                 | 0.257       | 0.33      | 175.7 | 219.3     |
| 152  | Gln        | 8.40                                                         | 0.66  | 9.09      | 0.43  | 17.20                                          | 16.01     | 0.008                | 0.62          | N/A                                 | 0.06        | 0.095     | 25.3  | 66.8      |
| 153  | Ala        | 6.13                                                         | 0.18  | 6.50      | 0.45  | 9.50                                           | 8.24      | 0.012                | 0.572         | 900                                 | 0           | 0.003     | 0.0   | 0.0       |
| 154  | His        | 4.58                                                         | 0.32  | 5.41      | 1.45  | 6.41                                           | 6.24      | 0.017                | 0.535         | N/A                                 | 0           | 0         | 0.0   | 0.0       |
| 155  | Gly        | 6.64                                                         | 0.24  | 12.15     | 1.81  | 6.00                                           | 5.41      | 0.021                | 0.431         | N/A                                 | 0           | 0         | 0.0   | 0.0       |
| 156  | Leu        | 6.36                                                         | 0.91  | 5.10      | 0.99  | 5.24                                           | 5.50      | 0.011                | 0.611         | 900                                 | 0           | 0.002     | 0.0   | 0.0       |
| 157  | Cys        | 4.17                                                         | 0.19  | 3.54      | 0.4   | 3.76                                           | 3.41      | 0.005                | 0.611         | N/A                                 | 0           | 0         | 0.0   | 0.0       |
| 158  | Phe        | 12.64                                                        | 1.23  | 11.74     | 0.96  | 5.05                                           | 3.48      | 0.009                | 0.807         | N/A                                 | 0.011       | 0         | 6.6   | 0.0       |
| 159  | Ser        | n. o                                                         | n. o  | n. o      | n. o  | 4.65                                           | 4.24      | n. o                 | 0.808         | N/A                                 | 0           | 0         | 0.0   | 0.0       |
| 160  | Val        | 3.02                                                         | 0.51  | 5.92      | 1.11  | 7.91                                           | 6.95      | 0                    | 0.884         | N/A                                 | 0           | 0         | 0.0   | 0.0       |
| 161  | Gln        | n. o                                                         | n. o  | n. o      | n. o  | 12.99                                          | 13.6      | n. o                 | 0.989         | N/A                                 | 0.029       | 0.028     | 9.8   | 12.1      |
| 162  | Arg        | 13.64                                                        | 0.35  | 14.5      | 0.56  | 33.56                                          | 29.49     | 0.009                | 1.21          | N/A                                 | 0.265       | 0.251     | 166.6 | 189.6     |
| 163  | Pro        | —                                                            | —     | —         | —     | —                                              | —         | —                    | 1.497         | N/A                                 | 0.568       | 0.721     | 384.8 | 462.4     |
| 164  | Val        | 8.49                                                         | 0.29  | 9.57      | 0.55  | 28.14                                          | 40.15     | 0.006                | 1.362         | N/A                                 | 0.285       | 0.407     | 194.0 | 339.6     |
| 165  | Pro        | —                                                            | —     | —         | —     | —                                              | —         | —                    | 1.335         | N/A                                 | 0.385       | 0.371     | 271.6 | 267.7     |
| 166  | Pro        | —                                                            | —     | —         | —     | —                                              | —         | —                    | 1.079         | N/A                                 | 0.043       | 0.036     | 15.8  | 20.6      |
| 167  | Pro        | —                                                            | —     | —         | —     | —                                              | —         | —                    | 1.055         | N/A                                 | 0.34        | 0.113     | 213.6 | 70.7      |
| 168  | Pro        | —                                                            | —     | —         | —     | —                                              | —         | —                    | 1.255         | N/A                                 | 0.373       | 0.051     | 253.1 | 29.5      |
| 169  | Ser        | 26.96                                                        | 0.99  | 26.39     | 1.73  | 20.43                                          | 5.97      | 0.015                | 1.176         | 900                                 | 0.173       | 0.011     | 107.2 | 11.5      |
| 170  | Leu        | 9.14                                                         | 0.4   | 12.89     | 1.12  | 10.98                                          | 5.72      | 0.012                | 0.91          | N/A                                 | 0.035       | 0.007     | 14.3  | 0.8       |
| 171  | Glu        | 8.86                                                         | 0.26  | 8.51      | 0.28  | 15.52                                          | 8.98      | 0.015                | 0.774         | N/A                                 | 0.069       | 0.028     | 38.4  | 16.8      |
| 172  | Asn        | 12.18                                                        | 1.07  | 8.97      | 0.55  | 13.63                                          | 8.12      | 0.019                | 0.928         | N/A                                 | 0.043       | 0.01      | 18.6  | 5.3       |
| 173  | Ile        | n. o                                                         | n. o  | n. o      | n. o  | 8.77                                           | 7.18      | n. o                 | 0.717         | N/A                                 | 0           | 0         | 0.0   | 0.0       |
| 174  | Tyr        | n. o                                                         | n. o  | n. o      | n. o  | 9.50                                           | 8.16      | n. o                 | 0.507         | N/A                                 | 0.003       | 0.005     | 0.0   | 1.0       |
| 175  | Lys        | n. o                                                         | n. o  | n. o      | n. o  | 15.78                                          | 14.70     | n. o                 | 0.645         | N/A                                 | 0.076       | 0.045     | 43.9  | 32.8      |
| 176  | Glu        | n. o                                                         | n. o  | n. o      | n. o  | 13.57                                          | 11.95     | n. o                 | 0.828         | N/A                                 | 0.039       | 0.022     | 14.3  | 9.5       |
| 177  | Leu        | n. o                                                         | n. o  | n. o      | n. o  | 10.82                                          | 9.73      | n. o                 | 0.646         | N/A                                 | 0.004       | 0.002     | 0.0   | 0.0       |
| 178  | Ser        | 14.66                                                        | 0.94  | 25.37     | 2.84  | 20.68                                          | 17.40     | 0                    | 0.652         | N/A                                 | 0.121       | 0.097     | 83.5  | 70.4      |
| 179  | Thr        | 8.95                                                         | 0.35  | 9.68      | 0.24  | 30.85                                          | 26.17     | 0.001                | 0.96          | N/A                                 | 0.295       | 0.248     | 240.5 | 212.9     |
| 180  | Asp        | 9.70                                                         | 0.66  | 13.05     | 1.25  | 22.06                                          | 19.34     | 0.008                | 1.002         | N/A                                 | 0.161       | 0.127     | 100.9 | 86.0      |
| 181  | Ile        | 6.79                                                         | 0.19  | 8.55      | 0.38  | 17.63                                          | 15.09     | 0.005                | 0.897         | N/A                                 | 0.086       | 0.048     | 31.1  | 23.2      |

| Res. | amino acid | $\Gamma_2^{\text{Meas}'}$ ( $\text{s}^{-1} \text{mM}^{-1}$ ) |       |           |       | $\Gamma_2^{\text{Pred}'}$ ( $\times 10^{-4}$ ) |           | $\Delta\delta$ (ppm) | NMA (arb. u.) | $k_{\text{ex}}$ ( $\text{s}^{-1}$ ) | depth index |           | ASA   |           |
|------|------------|--------------------------------------------------------------|-------|-----------|-------|------------------------------------------------|-----------|----------------------|---------------|-------------------------------------|-------------|-----------|-------|-----------|
|      |            | free                                                         | error | DNA-bound | error | free                                           | DNA-bound |                      |               |                                     | free        | DNA-bound | free  | DNA-bound |
| 182  | Glu        | 14.2                                                         | 0.34  | 15.35     | 1.41  | 43.99                                          | 40.50     | 0.008                | 1.11          | N/A                                 | 0.372       | 0.264     | 208.6 | 157.2     |
| 183  | Asp        | 14.52                                                        | 0.52  | 15.24     | 1.27  | 37.36                                          | 39.49     | 0.011                | 0.999         | N/A                                 | 0.376       | 0.411     | 257.0 | 318.6     |
| 184  | Phe        | 9.87                                                         | 0.64  | 9.65      | 0.29  | 31.21                                          | 25.44     | 0.007                | 0.704         | N/A                                 | 0.247       | 0.164     | 161.3 | 119.7     |
| 185  | Val        | 13.46                                                        | 0.5   | 4.36      | 0.38  | 27.79                                          | 31.00     | 0.014                | 0.39          | N/A                                 | 0.236       | 0.295     | 163.6 | 241.8     |
| 186  | His        | 13.42                                                        | 0.48  | 14.13     | 0.3   | 67.67                                          | 66.10     | 0.007                | 0.11          | N/A                                 | 0.522       | 0.498     | 315.5 | 311.4     |
| 187  | Pro        | —                                                            | —     | —         | —     | —                                              | —         | —                    | 0.4           | N/A                                 | 0.479       | 0.322     | 277.6 | 208.5     |
| 188  | Gly        | 12.93                                                        | 1.17  | 25.59     | 3.1   | 39.61                                          | 40.48     | 0.002                | 0.737         | N/A                                 | 0.371       | 0.411     | 248.8 | 298.0     |
| 189  | His        | 11.26                                                        | 0.52  | 9.52      | 0.34  | 26.89                                          | 28.05     | 0.008                | 0.872         | N/A                                 | 0.21        | 0.257     | 158.2 | 214.4     |
| 190  | Gly        | 5.83                                                         | 0.23  | 8.62      | 0.63  | 14.55                                          | 15.95     | 0.009                | 0.903         | N/A                                 | 0.023       | 0.058     | 4.4   | 37.3      |
| 191  | Asp        | 6.79                                                         | 0.5   | 8.14      | 0.65  | 12.34                                          | 13.59     | 0.009                | 0.85          | N/A                                 | 0.024       | 0.014     | 9.9   | 0.0       |
| 192  | Leu        | 13.23                                                        | 0.99  | 15.83     | 1.91  | 7.85                                           | 7.88      | 0                    | 0.668         | N/A                                 | 0.007       | 0.004     | 0.0   | 0.0       |
| 193  | Ser        | 12.68                                                        | 1.2   | 14.78     | 0.96  | 13.65                                          | 12.14     | 0                    | 0.689         | N/A                                 | 0.088       | 0.054     | 59.3  | 38.7      |
| 194  | Gly        | 15.42                                                        | 1.25  | 15.18     | 1.47  | 19.23                                          | 16.47     | 0.006                | 0.675         | N/A                                 | 0.13        | 0.107     | 78.9  | 75.2      |
| 195  | Trp        | 7.27                                                         | 0.16  | 10.52     | 0.37  | 9.84                                           | 8.92      | 0.005                | 0.528         | N/A                                 | 0.027       | 0.006     | 12.1  | 0.8       |
| 196  | Ala        | n. o                                                         | n. o  | n. o      | n. o  | 8.11                                           | 7.29      | n. o                 | 0.487         | N/A                                 | 0.008       | 0         | 0.0   | 0.0       |
| 197  | Lys        | 13.01                                                        | 0.88  | 13.07     | 0.9   | 15.09                                          | 13.72     | 0.011                | 0.533         | N/A                                 | 0.107       | 0.077     | 68.0  | 57.3      |
| 198  | Gln        | 13.54                                                        | 0.43  | 13.36     | 0.82  | 14.20                                          | 15.37     | 0.003                | 0.6           | N/A                                 | 0.082       | 0.092     | 57.2  | 66.0      |
| 199  | Gly        | 13.33                                                        | 0.59  | 13.6      | 0.98  | 10.69                                          | 11.03     | 0.006                | 0.54          | N/A                                 | 0.044       | 0.055     | 29.7  | 42.6      |
| 200  | Val        | n. o                                                         | n. o  | n. o      | n. o  | 6.73                                           | 7.09      | n. o                 | 0.429         | N/A                                 | 0.001       | 0.004     | 0.0   | 0.0       |
| 201  | Leu        | n. o                                                         | n. o  | n. o      | n. o  | 4.26                                           | 4.56      | n. o                 | 0.437         | N/A                                 | 0           | 0         | 0.0   | 0.0       |
| 202  | Leu        | 3.40                                                         | 0.25  | 2.85      | 0.3   | 3.99                                           | 3.94      | 0.012                | 0.532         | N/A                                 | 0           | 0         | 0.0   | 0.0       |
| 203  | Leu        | n. o                                                         | n. o  | n. o      | n. o  | 3.52                                           | 3.13      | n. o                 | 0.523         | N/A                                 | 0           | 0         | 0.0   | 0.0       |
| 204  | Asn        | 5.42                                                         | 0.42  | 2.85      | 0.7   | 3.79                                           | 3.23      | 0.005                | 0.518         | N/A                                 | 0           | 0         | 0.0   | 0.0       |
| 205  | Ala        | 13.48                                                        | 0.75  | 11.6      | 0.9   | 5.28                                           | 3.55      | 0.011                | 0.5           | N/A                                 | 0           | 0         | 0.0   | 0.0       |
| 206  | Val        | n. o                                                         | n. o  | n. o      | n. o  | 5.50                                           | 4.35      | n. o                 | 0.443         | N/A                                 | 0.001       | 0         | 0.0   | 0.0       |
| 207  | Leu        | n. a.                                                        | n. a. | n. a.     | n. a. | 5.51                                           | 4.99      | n. a.                | 0.27          | N/A                                 | 0           | 0         | 0.0   | 0.0       |
| 208  | Thr        | n. o                                                         | n. o  | n. o      | n. o  | 5.75                                           | 5.14      | n. o                 | 0.303         | N/A                                 | 0           | 0         | 0.0   | 0.0       |
| 209  | Val        | n. o                                                         | n. o  | n. o      | n. o  | 7.26                                           | 6.31      | n. o                 | 0.579         | N/A                                 | 0           | 0         | 0.0   | 0.0       |
| 210  | Arg        | 12.27                                                        | 1.57  | 11.67     | 2.41  | 11.87                                          | 7.33      | 0.003                | 1.114         | N/A                                 | 0.008       | 0.004     | 0.0   | 1.1       |
| 211  | Ala        | 14.5                                                         | 0.47  | 14.73     | 0.8   | 18.27                                          | 16.77     | 0.012                | 1.124         | N/A                                 | 0.062       | 0.072     | 31.3  | 46.0      |
| 212  | His        | 14.61                                                        | 0.56  | 22.3      | 1.09  | 24.03                                          | 14.79     | 0.016                | 1.248         | N/A                                 | 0.178       | 0.083     | 90.2  | 49.5      |
| 213  | Gln        | 14.87                                                        | 0.83  | 20.18     | 1.69  | 25.61                                          | 12.67     | 0.011                | 1.551         | N/A                                 | 0.195       | 0.075     | 135.9 | 59.7      |
| 214  | Ala        | 17.77                                                        | 3.12  | 30.59     | 3.51  | 65.66                                          | 10.05     | 0.017                | 1.551         | N/A                                 | 0.556       | 0.042     | 346.4 | 20.5      |
| 215  | Asn        | 32.34                                                        | 4.87  | 29.56     | 1.79  | 18.62                                          | 4.78      | 0.002                | 1.326         | N/A                                 | 0.173       | 0.006     | 126.9 | 6.6       |
| 216  | Ser        | 14.7                                                         | 0.66  | 25.75     | 3.01  | 22.21                                          | 6.48      | 0.009                | 1.418         | N/A                                 | 0.158       | 0.01      | 97.6  | 4.7       |
| 217  | His        | 13.57                                                        | 0.41  | 13.73     | 0.73  | 13.68                                          | 6.16      | 0.015                | 1.197         | N/A                                 | 0.048       | 0.005     | 27.5  | 3.2       |
| 218  | Lys        | 15.19                                                        | 0.95  | 15.04     | 1.07  | 18.34                                          | 7.08      | 0.016                | 0.978         | N/A                                 | 0.1         | 0.006     | 61.9  | 2.1       |
| 219  | Glu        | 14.01                                                        | 0.24  | 24.99     | 3.21  | 18.65                                          | 12.30     | 0.019                | 0.979         | N/A                                 | 0.117       | 0.08      | 60.2  | 53.4      |
| 220  | Arg        | 13.64                                                        | 0.34  | 14.69     | 2.15  | 18.15                                          | 14.68     | 0.005                | 0.89          | N/A                                 | 0.11        | 0.1       | 75.6  | 80.0      |
| 221  | Gly        | 13.53                                                        | 0.56  | 13.9      | 1.77  | 21.17                                          | 19.59     | 0.004                | 0.591         | N/A                                 | 0.146       | 0.147     | 92.2  | 101.8     |
| 222  | Trp        | 9.45                                                         | 0.83  | 12.1      | 1.67  | 10.64                                          | 8.96      | 8E-04                | 0.269         | N/A                                 | 0.022       | 0.035     | 9.9   | 24.4      |
| 223  | Glu        | 12.48                                                        | 0.8   | 12.86     | 1.22  | 12.28                                          | 10.18     | 0.007                | 0.352         | N/A                                 | 0.042       | 0.047     | 19.7  | 33.6      |
| 224  | Gln        | 6.04                                                         | 0.49  | 7.22      | 0.95  | 18.64                                          | 18.82     | 0.011                | 0.356         | N/A                                 | 0.192       | 0.146     | 154.8 | 98.9      |
| 225  | Phe        | n. o                                                         | n. o  | n. o      | n. o  | 11.90                                          | 11.09     | n. o                 | 0.248         | N/A                                 | 0.039       | 0.04      | 13.2  | 22.4      |
| 226  | Thr        | n. o                                                         | n. o  | n. o      | n. o  | 7.95                                           | 7.36      | n. o                 | 0.389         | N/A                                 | 0.006       | 0.006     | 0.0   | 0.0       |
| 227  | Asp        | 8.79                                                         | 0.42  | 9.33      | 0.5   | 12.86                                          | 10.91     | 0.004                | 0.485         | N/A                                 | 0.082       | 0.06      | 50.5  | 43.9      |
| 228  | Ala        | n. o                                                         | n. o  | n. o      | n. o  | 16.62                                          | 13.97     | n. o                 | 0.471         | N/A                                 | 0.109       | 0.079     | 66.9  | 49.8      |
| 229  | Val        | n. o                                                         | n. o  | n. o      | n. o  | 9.34                                           | 8.31      | n. o                 | 0.461         | N/A                                 | 0.023       | 0.014     | 10.9  | 8.4       |
| 230  | Val        | n. o                                                         | n. o  | n. o      | n. o  | 8.20                                           | 8.18      | n. o                 | 0.541         | N/A                                 | 0.015       | 0.015     | 2.2   | 10.5      |
| 231  | Ser        | 8.55                                                         | 0.14  | 9.09      | 0.54  | 14.61                                          | 14.02     | 0.006                | 0.591         | N/A                                 | 0.097       | 0.086     | 68.0  | 59.2      |

| Res. | amino acid | $\Gamma_2^{\text{Meas}'}$ ( $\text{s}^{-1} \text{mM}^{-1}$ ) |       |           |       | $\Gamma_2^{\text{Pred}'}$ ( $\times 10^{-4}$ ) |           | $\Delta\delta$ (ppm) | NMA (arb. u.) | $k_{\text{ex}}$ ( $\text{s}^{-1}$ ) | depth index |           | ASA   |           |
|------|------------|--------------------------------------------------------------|-------|-----------|-------|------------------------------------------------|-----------|----------------------|---------------|-------------------------------------|-------------|-----------|-------|-----------|
|      |            | free                                                         | error | DNA-bound | error | free                                           | DNA-bound |                      |               |                                     | free        | DNA-bound | free  | DNA-bound |
| 232  | Trp        | 10.05                                                        | 0.75  | 8.98      | 0.74  | 15.24                                          | 12.86     | 0.002                | 0.543         | N/A                                 | 0.088       | 0.061     | 54.9  | 53.1      |
| 233  | Leu        | n. o                                                         | n. o  | n. o      | n. o  | 9.41                                           | 9.10      | n. o                 | 0.532         | N/A                                 | 0.006       | 0.002     | 1.1   | 0.0       |
| 234  | Asn        | n. o                                                         | n. o  | n. o      | n. o  | 10.87                                          | 11.07     | n. o                 | 0.543         | N/A                                 | 0.008       | 0.008     | 0.0   | 0.5       |
| 235  | Gln        | 12.6                                                         | 0.96  | 13.6      | 0.55  | 19.07                                          | 20.08     | 0.002                | 0.63          | N/A                                 | 0.112       | 0.121     | 46.1  | 80.4      |
| 236  | Asn        | n. o                                                         | n. o  | n. o      | n. o  | 20.47                                          | 22.79     | n. o                 | 0.637         | N/A                                 | 0.15        | 0.169     | 77.2  | 121.7     |
| 237  | Ser        | 11.66                                                        | 0.75  | 13.67     | 0.31  | 19.77                                          | 24.85     | 0.006                | 0.554         | N/A                                 | 0.124       | 0.202     | 83.0  | 147.5     |
| 238  | Asn        | 14.31                                                        | 0.27  | 15.7      | 1.53  | 30.78                                          | 46.51     | 0.008                | 0.495         | N/A                                 | 0.249       | 0.334     | 151.1 | 209.9     |
| 239  | Gly        | 59.99                                                        | 5.79  | 58.32     | 3.95  | 22.35                                          | 30.70     | 0.003                | 0.336         | N/A                                 | 0.163       | 0.278     | 103.0 | 199.7     |
| 240  | Leu        | 11.93                                                        | 0.33  | 14.05     | 0.29  | 11.23                                          | 12.69     | 0.002                | 0.296         | N/A                                 | 0.027       | 0.039     | 6.5   | 19.2      |
| 241  | Val        | n. o                                                         | n. o  | n. o      | n. o  | 6.94                                           | 7.28      | n. o                 | 0.181         | N/A                                 | 0           | 0         | 0.0   | 0.0       |
| 242  | Phe        | n. o                                                         | n. o  | n. o      | n. o  | 7.59                                           | 7.78      | n. o                 | 0.171         | N/A                                 | 0.004       | 0.004     | 0.0   | 0.5       |
| 243  | Leu        | n. o                                                         | n. o  | n. o      | n. o  | 5.05                                           | 4.84      | n. o                 | 0.23          | N/A                                 | 0           | 0         | 0.0   | 0.0       |
| 244  | Leu        | n. o                                                         | n. o  | n. o      | n. o  | 8.34                                           | 8.24      | n. o                 | 0.297         | N/A                                 | 0.003       | 0.01      | 0.0   | 0.0       |
| 245  | Trp        | n. o                                                         | n. o  | n. o      | n. o  | 6.78                                           | 5.05      | n. o                 | 0.54          | 900                                 | 0           | 0         | 0.0   | 0.0       |
| 246  | Gly        | 70                                                           | 6.72  | 54.69     | 2.22  | 14.90                                          | 7.94      | 0.064                | 0.805         | 900                                 | 0.078       | 0.021     | 42.5  | 14.5      |
| 247  | Ser        | n. a.                                                        | n. a. | n. a.     | n. a. | 36.46                                          | 11.60     | n. a.                | 0.728         | N/A                                 | 0.285       | 0.061     | 168.9 | 47.3      |
| 248  | Tyr        | n. a.                                                        | n. a. | n. a.     | n. a. | 26.48                                          | 8.92      | n. a.                | 0.649         | N/A                                 | 0.218       | 0.031     | 133.5 | 24.2      |
| 249  | Ala        | 70                                                           | 0     | 59.57     | 6.07  | 11.96                                          | 6.13      | 0.018                | 0.585         | 900                                 | 0.037       | 0.007     | 21.3  | 0.0       |
| 250  | Gln        | 31.07                                                        | 4.24  | 30.26     | 2.49  | 14.87                                          | 10.78     | 0.049                | 0.569         | N/A                                 | 0.067       | 0.063     | 30.7  | 41.0      |
| 251  | Lys        | n. o                                                         | n. o  | n. o      | n. o  | 24.84                                          | 15.60     | n. o                 | 0.638         | N/A                                 | 0.205       | 0.125     | 126.1 | 90.2      |
| 252  | Lys        | 20.89                                                        | 0.98  | 14.73     | 1.06  | 18.86                                          | 12.89     | 0.006                | 0.599         | N/A                                 | 0.125       | 0.076     | 75.7  | 58.9      |
| 253  | Gly        | 13.38                                                        | 0.54  | 13.25     | 0.76  | 14.18                                          | 17.88     | 0.016                | 0.54          | N/A                                 | 0.06        | 0.131     | 28.6  | 90.0      |
| 254  | Ser        | 15.27                                                        | 1.07  | 24.8      | 1.7   | 29.64                                          | 41.78     | 0.01                 | 0.613         | N/A                                 | 0.273       | 0.444     | 188.8 | 308.5     |
| 255  | Ala        | 14.88                                                        | 0.76  | 26.02     | 2.36  | 32.64                                          | 31.72     | 0.016                | 0.65          | N/A                                 | 0.355       | 0.358     | 256.9 | 303.0     |
| 256  | Ile        | 11.99                                                        | 0.35  | 13.68     | 0.67  | 22.91                                          | 22.86     | 0.003                | 0.569         | N/A                                 | 0.195       | 0.192     | 131.6 | 157.5     |
| 257  | Asp        | 13.63                                                        | 0.44  | 14.28     | 0.55  | 22.26                                          | 24.45     | 0.007                | 0.509         | N/A                                 | 0.152       | 0.172     | 97.6  | 116.5     |
| 258  | Arg        | 15.51                                                        | 1.28  | 26.79     | 2.64  | 58.93                                          | 53.05     | 0.004                | 0.375         | N/A                                 | 0.456       | 0.402     | 273.3 | 251.7     |
| 259  | Lys        | 28.36                                                        | 1.38  | 28.53     | 3.63  | 52.08                                          | 42.11     | 0.006                | 0.333         | N/A                                 | 0.477       | 0.431     | 297.4 | 322.5     |
| 260  | Arg        | n. o                                                         | n. o  | n. o      | n. o  | 31.42                                          | 45.57     | n. o                 | 0.354         | N/A                                 | 0.286       | 0.428     | 194.5 | 313.3     |
| 261  | His        | 26.94                                                        | 1.21  | 27.8      | 1.13  | 20.20                                          | 22.25     | 0.007                | 0.292         | N/A                                 | 0.132       | 0.134     | 67.6  | 93.3      |
| 262  | His        | 12.06                                                        | 0.53  | 14.3      | 0.39  | 12.43                                          | 11.90     | 0.015                | 0.109         | N/A                                 | 0.048       | 0.034     | 21.7  | 18.4      |
| 263  | Val        | 14.11                                                        | 0.24  | 14.85     | 0.82  | 31.08                                          | 27.42     | 0.009                | 0.156         | N/A                                 | 0.228       | 0.189     | 135.0 | 119.7     |
| 264  | Leu        | n. o                                                         | n. o  | n. o      | n. o  | 11.42                                          | 11.78     | n. o                 | 0.219         | N/A                                 | 0.054       | 0.07      | 40.6  | 59.7      |
| 265  | Gln        | 15.3                                                         | 1.21  | 25.14     | 1.84  | 38.53                                          | 45.72     | 0.015                | 0.421         | N/A                                 | 0.302       | 0.337     | 185.4 | 203.6     |
| 266  | Thr        | 15.11                                                        | 0.99  | 15.06     | 1.01  | 17.38                                          | 13.52     | 0.032                | 0.713         | N/A                                 | 0.126       | 0.108     | 85.6  | 86.8      |
| 267  | Ala        | 15.86                                                        | 1.81  | 14.89     | 1.43  | 26.85                                          | 23.70     | 0.031                | 1.127         | N/A                                 | 0.223       | 0.206     | 144.9 | 135.8     |
| 268  | His        | 70                                                           | 0     | 58.06     | 3.5   | 17.48                                          | 7.30      | 0.029                | 1.276         | N/A                                 | 0.097       | 0.011     | 60.3  | 8.1       |
| 269  | Pro        | —                                                            | —     | —         | —     | —                                              | —         | —                    | 1.161         | N/A                                 | 0.001       | 0         | 0.0   | 0.0       |
| 270  | Ser        | 70                                                           | 0     | 55.44     | 0.95  | 13.06                                          | 4.34      | 0.076                | 1.563         | N/A                                 | 0.06        | 0         | 42.8  | 0.0       |
| 271  | Pro        | —                                                            | —     | —         | —     | —                                              | —         | —                    | 1.971         | N/A                                 | 0.273       | 0         | 165.4 | 0.0       |
| 272  | Leu        | 59.89                                                        | 9.03  | 51.18     | 8.2   | 41.37                                          | 6.27      | 0.098                | 2.537         | 900                                 | 0.426       | 0         | 277.9 | 0.0       |
| 273  | Ser        | 26.69                                                        | 1.32  | 27.19     | 1.26  | 25.22                                          | 6.32      | 0.07                 | 2.363         | N/A                                 | 0.159       | 0         | 81.4  | 0.0       |
| 274  | Val        | 54.33                                                        | 2.36  | 53.75     | 3.83  | 22.26                                          | 6.77      | 0.016                | 1.999         | 900                                 | 0.09        | 0         | 51.6  | 0.0       |
| 275  | Tyr        | 27.65                                                        | 0.52  | 28.35     | 1.48  | 32.70                                          | 12.07     | 0.065                | 2.149         | N/A                                 | 0.255       | 0.037     | 154.1 | 20.3      |
| 276  | Arg        | 28.42                                                        | 1.35  | 27.8      | 2.14  | 33.29                                          | 16.37     | 0.014                | 2.289         | N/A                                 | 0.317       | 0.122     | 215.9 | 84.9      |
| 277  | Gly        | 25.99                                                        | 1.91  | 26.52     | 1.68  | 45.55                                          | 24.72     | 0.06                 | 1.963         | N/A                                 | 0.434       | 0.242     | 284.2 | 179.4     |
| 278  | Phe        | 14.78                                                        | 0.71  | 16.19     | 2.2   | 22.55                                          | 15.68     | 0.013                | 1.458         | N/A                                 | 0.16        | 0.123     | 112.0 | 92.9      |
| 279  | Phe        | 13.65                                                        | 0.35  | 13.75     | 0.75  | 23.10                                          | 15.95     | 0.037                | 1.449         | N/A                                 | 0.149       | 0.111     | 93.2  | 83.9      |
| 280  | Gly        | 13.07                                                        | 0.75  | 13.87     | 0.56  | 34.75                                          | 31.06     | 0.025                | 1.438         | N/A                                 | 0.282       | 0.273     | 181.1 | 179.6     |
| 281  | Cys        | 12.94                                                        | 0.84  | 13.55     | 0.67  | 25.49                                          | 24.01     | 0.011                | 1.263         | N/A                                 | 0.21        | 0.214     | 162.3 | 175.9     |

| Res. | amino acid | $\Gamma_2^{\text{Meas}'}$ ( $\text{s}^{-1} \text{mM}^{-1}$ ) |       |           |       | $\Gamma_2^{\text{Pred}'}$ ( $\times 10^{-4}$ ) |           | $\Delta\delta$ (ppm) | NMA (arb. u.) | $k_{\text{ex}}$ ( $\text{s}^{-1}$ ) | depth index |           | ASA   |           |
|------|------------|--------------------------------------------------------------|-------|-----------|-------|------------------------------------------------|-----------|----------------------|---------------|-------------------------------------|-------------|-----------|-------|-----------|
|      |            | free                                                         | error | DNA-bound | error | free                                           | DNA-bound |                      |               |                                     | free        | DNA-bound | free  | DNA-bound |
| 282  | Arg        | 9.27                                                         | 0.52  | 12.55     | 1.22  | 19.21                                          | 18.10     | 0.006                | 1.013         | N/A                                 | 0.137       | 0.138     | 96.5  | 112.8     |
| 283  | His        | 3.36                                                         | 0.64  | 2.81      | 0.42  | 11.37                                          | 11.07     | 0.015                | 0.757         | N/A                                 | 0.007       | 0.025     | 0.0   | 15.8      |
| 284  | Phe        | 4.65                                                         | 0.27  | 5.83      | 0.53  | 9.43                                           | 7.79      | 0.006                | 0.572         | N/A                                 | 0           | 0         | 0.0   | 0.0       |
| 285  | Ser        | 7.50                                                         | 0.29  | 8.39      | 0.39  | 13.67                                          | 12.25     | 0.001                | 0.737         | N/A                                 | 0.04        | 0.028     | 27.4  | 21.6      |
| 286  | Lys        | 12.65                                                        | 0.46  | 13.58     | 0.61  | 16.26                                          | 15.03     | 0.011                | 0.768         | N/A                                 | 0.085       | 0.044     | 50.6  | 23.9      |
| 287  | Thr        | n. o                                                         | n. o  | n. o      | n. o  | 10.37                                          | 9.76      | n. o                 | 0.595         | N/A                                 | 0.012       | 0.008     | 0.0   | 3.7       |
| 288  | Asn        | 6.12                                                         | 0.34  | 5.87      | 0.07  | 12.29                                          | 10.44     | 0.003                | 0.638         | N/A                                 | 0.039       | 0.028     | 28.5  | 24.2      |
| 289  | Glu        | 12.36                                                        | 0.82  | 13.37     | 0.73  | 20.83                                          | 20.75     | 0.004                | 0.861         | N/A                                 | 0.122       | 0.125     | 73.6  | 86.5      |
| 290  | Leu        | n. o                                                         | n. o  | n. o      | n. o  | 17.61                                          | 16.75     | n. o                 | 0.735         | N/A                                 | 0.067       | 0.073     | 23.0  | 48.2      |
| 291  | Leu        | n. o                                                         | n. o  | n. o      | n. o  | 12.86                                          | 14.26     | n. o                 | 0.651         | N/A                                 | 0.002       | 0.01      | 0.0   | 1.3       |
| 292  | Gln        | 8.64                                                         | 0.51  | 10.82     | 1.28  | 23.07                                          | 22.11     | 0.005                | 0.919         | N/A                                 | 0.153       | 0.125     | 73.0  | 86.3      |
| 293  | Lys        | 13.22                                                        | 0.64  | 14.84     | 0.91  | 34.22                                          | 37.48     | 0.005                | 1.032         | N/A                                 | 0.306       | 0.318     | 190.7 | 212.8     |
| 294  | Ser        | 14.24                                                        | 0.24  | 15.01     | 0.99  | 32.97                                          | 36.49     | 0.007                | 0.908         | N/A                                 | 0.324       | 0.355     | 236.9 | 268.3     |
| 295  | Gly        | 14.18                                                        | 0.36  | 19.62     | 1.99  | 59.08                                          | 76.45     | 0.006                | 1.078         | N/A                                 | 0.602       | 0.694     | 403.8 | 450.8     |
| 296  | Lys        | 13.46                                                        | 0.43  | 14.16     | 0.25  | 37.64                                          | 45.04     | 0.004                | 0.98          | N/A                                 | 0.383       | 0.479     | 287.3 | 359.2     |
| 297  | Lys        | 28.9                                                         | 1.57  | 29.36     | 2.69  | 48.92                                          | 53.30     | 0.007                | 0.989         | N/A                                 | 0.387       | 0.395     | 232.7 | 256.4     |
| 298  | Pro        | —                                                            | —     | —         | —     | —                                              | —         | —                    | 0.864         | N/A                                 | 0.094       | 0.078     | 67.7  | 66.3      |
| 299  | Ile        | 5.44                                                         | 0.48  | 6.22      | 0.16  | 12.48                                          | 11.59     | 0.005                | 0.582         | N/A                                 | 0.043       | 0.023     | 25.3  | 14.2      |
| 300  | Asp        | 7.76                                                         | 0.12  | 9.49      | 0.21  | 17.44                                          | 17.75     | 0.007                | 0.685         | N/A                                 | 0.104       | 0.096     | 63.8  | 60.0      |
| 301  | Trp        | 6.81                                                         | 0.06  | 6.93      | 0.39  | 13.16                                          | 13.52     | 0.01                 | 0.501         | N/A                                 | 0.05        | 0.058     | 30.5  | 41.6      |
| 302  | Lys        | 8.07                                                         | 0.58  | 9.15      | 0.78  | 16.46                                          | 17.88     | 0.006                | 0.478         | N/A                                 | 0.056       | 0.124     | 23.2  | 89.2      |
| 303  | Glu        | 9.46                                                         | 0.57  | 12.55     | 1.49  | 18.20                                          | 20.40     | 0.006                | 0.594         | N/A                                 | 0.085       | 0.164     | 19.7  | 128.4     |
| 304  | Leu        | 23.83                                                        | 1.43  | 20.95     | 2.31  | 30.40                                          | 38.47     | 0.005                | 0.61          | N/A                                 | 0.262       | 0.315     | 167.8 | 198.6     |

<sup>a</sup> The PRE values were measured using samples with  $[\text{Gd}^{3+}] = 1.0, 2.5, 5.0, 10.0$  mM. The linear slopes of the PRE values at different  $\text{Gd}^{3+}$  concentrations were obtained as the molar relaxivity ( $\Gamma_2^{\text{Meas}'}$ ). Errors in the relaxation rates were propagated from the estimated errors in the peak intensities by measuring corresponding variances in the duplicated spectra acquired.

<sup>b</sup> n. a.  $\equiv$  no assignment.

<sup>c</sup> No amide protons because they are proline residues.

<sup>d</sup> n. o.  $\equiv$  not observable. For  $^2\text{H}$  labeled hUNG, these residues exchange with water extremely slowly, so they show either no or very weak signals in the  $^1\text{H}$ - $^{15}\text{N}$  HSQC spectra.

<sup>e</sup> The predicted PREs ( $\Gamma_2^{\text{Pred}'}$ ) were calculated using the grid-based approach (1, 2) and the atom coordinates obtained from the crystal structures of the free enzyme (1AKZ) and its non-specific DNA complex (2OXM).

<sup>f</sup> Heteronuclear ( $^1\text{H}$ ,  $^{15}\text{N}$ ) weighted chemical shift perturbations.

<sup>g</sup> Amide nitrogen displacement using the lowest frequency normal mode analysis for the free hUNG (pdb code 1AKZ).

<sup>h</sup> Exchange constants that describes dynamic exchange between two states. The exchange rates were evaluated using NMR relaxation experiments previously (3)

<sup>ij</sup> Depth index and accessible surface area (ASA) calculated using SADIC program and  $\text{Gd}^{3+}$  probe size in the form of ProHance ( $3.5 \text{ \AA}$ )(1, 4).

**Table S2.** Summary of structural and dynamic properties of residues in the protected sites

| Res. | Amino acid | polarity | Structure feature <sup>a</sup> | Conservation score <sup>b</sup> | Depth Index <sup>c</sup> |           | $\Gamma_2^{\text{Meas}}/\Gamma_2^{\text{Pred}} \supset d$ |           |
|------|------------|----------|--------------------------------|---------------------------------|--------------------------|-----------|-----------------------------------------------------------|-----------|
|      |            |          |                                |                                 | free                     | DNA-bound | Free                                                      | DNA-bound |
| 95   | Gly        | nonpolar | h                              | 2.431                           | 0.459                    | 0.377     | 0.25                                                      | 0.31      |
| 96   | Glu        | negative | h                              | -0.78                           | 0.215                    | 0.2       | 0.29                                                      | 0.43      |
| 97   | Phe        | nonpolar | h                              | -0.357                          | 0.214                    | 0.277     | 0.30                                                      | 0.32      |
| 98   | Gly        | nonpolar | h                              | 2.428                           | 0.458                    | 0.49      | 0.23                                                      | 0.20      |
| 99   | Lys        | positive | c                              | -0.025                          | 0.337                    | 0.403     | 0.20                                                      | 0.22      |
| 100  | Pro        | nonpolar | h                              | 0.838                           | 0.596                    | 0.507     | N/A                                                       | N/A       |
| 101  | Tyr        | polar    | h                              | -0.862                          | 0.451                    | 0.384     | 0.23                                                      | 0.30      |
| 102  | Phe        | nonpolar | h                              | -0.319                          | 0.111                    | 0.08      | 0.21                                                      | 0.65      |
| 103  | Ile        | nonpolar | h                              | 2.401                           | 0.153                    | 0.193     | 0.26                                                      | 0.33      |
| 104  | Lys        | psotive  | h                              | 2.433                           | 0.276                    | 0.264     | 0.23                                                      | 0.26      |
| 105  | Leu        | nonpolar | h                              | -0.516                          | 0.116                    | 0.1       | 0.22                                                      | 0.36      |
| 106  | Met        | nonpolar | h                              | 0.62                            | 0.108                    | 0.127     | N/A                                                       | N/A       |
| 107  | Gly        | nonpolar | h                              | 2.434                           | 0.297                    | 0.315     | 0.33                                                      | 0.33      |
| 108  | Phe        | nonpolar | h                              | 0.699                           | 0.23                     | 0.239     | 0.33                                                      | 0.40      |
| 182  | Glu        | negative | c                              | 2.323                           | 0.372                    | 0.264     | 0.32                                                      | 0.37      |
| 183  | Asp        | negative | c                              | -0.148                          | 0.376                    | 0.411     | 0.38                                                      | 0.38      |
| 184  | Phe        | nonpolar | c                              | 0.366                           | 0.247                    | 0.164     | 0.31                                                      | 0.37      |
| 185  | Val        | nonpolar | c                              | 2.434                           | 0.236                    | 0.295     | 0.48                                                      | 0.14      |
| 186  | His        | polar    | c                              | 0.38                            | 0.522                    | 0.498     | 0.2                                                       | 0.21      |
| 187  | Pro        | nonpolar | c                              | -0.881                          | 0.479                    | 0.322     | N/A                                                       | N/A       |
| 188  | Gly        | nonpolar | c                              | 2.409                           | 0.371                    | 0.411     | 0.32                                                      | 0.63      |
| 292  | Gln        | polar    | h                              | 2.434                           | 0.153                    | 0.125     | 0.37                                                      | 0.48      |
| 293  | Lys        | positive | h                              | 2.433                           | 0.306                    | 0.318     | 0.38                                                      | 0.39      |
| 294  | Ser        | polar    | h                              | 0.892                           | 0.324                    | 0.355     | 0.43                                                      | 0.41      |
| 295  | Gly        | nonpolar | c                              | -0.428                          | 0.602                    | 0.694     | 0.24                                                      | 0.25      |
| 296  | Lys        | positive | c                              | 2.227                           | 0.383                    | 0.479     | 0.35                                                      | 0.31      |
| 297  | Lys        | positive | c                              | 2.434                           | 0.387                    | 0.395     | 0.58                                                      | 0.54      |

<sup>a</sup> h  $\equiv$  helical; c  $\equiv$  coil

<sup>b</sup> Lower conservation score indicates the functionally important amino acids on the protein surface which have slow evolution rates and was calculated through the web server <http://consurf.tau.ac.il/> based on the phylogenetic relations between its close sequence homologues.

<sup>c</sup> Depth index calculated using SADIC program and Gd<sup>3+</sup> probe size in the form of ProHance (3.5 Å).

<sup>d</sup> The ratios between the measured and predicted PRE values across the protein sequence for free hUNG and its complex with DNA.



**Table S3.** Summary of structural and dynamic properties of residues in the hyper-reactive sites

| Res. | Amino acid | polarity | Structure Feature <sup>a</sup> | Conservation score <sup>b</sup> | Depth index <sup>c</sup> |           | $\Gamma_2^{\text{Meas}}/\Gamma_2^{\text{Pred}^d}$ |           |
|------|------------|----------|--------------------------------|---------------------------------|--------------------------|-----------|---------------------------------------------------|-----------|
|      |            |          |                                |                                 | free                     | DNA-bound | free                                              | DNA-bound |
| 129  | Thr        | polar    | h                              | -0.385                          | 0.002                    | 0.004     | 3.97                                              | 7.70      |
| 130  | Gln        | polar    | h                              | 0.596                           | 0.074                    | 0.04      | 1.66                                              | 2.72      |
| 131  | Met        | nonpolar | h                              | 2.374                           | 0.096                    | 0.084     | 2.05                                              | 2.11      |
| 132  | Cys        | polar    | c                              | -0.765                          | 0.112                    | 0.105     | 1.78                                              | 1.95      |
| 144  | Gln        | polar    | c                              | -0.952                          | 0.028                    | 0         | 8.09                                              | 15.23     |
| 145  | Asp        | negative | c                              | -0.952                          | 0.053                    | 0         | 6.34                                              | 15.68     |
| 169  | Ser        | polar    | h                              | -0.955                          | 0.173                    | 0.011     | 1.32                                              | 4.42      |
| 170  | Leu        | nonpolar | h                              | -0.945                          | 0.035                    | 0.007     | 0.83                                              | 2.25      |
| 214  | Ala        | nonpolar | c                              | -0.715                          | 0.556                    | 0.042     | 0.27                                              | 3.05      |
| 215  | Asn        | polar    | c                              | -0.578                          | 0.173                    | 0.006     | 1.74                                              | 6.18      |
| 216  | Ser        | polar    | c                              | -0.937                          | 0.158                    | 0.01      | 0.66                                              | 3.97      |
| 246  | Gly        | nonpolar | c                              | -0.945                          | 0.078                    | 0.021     | 4.7                                               | 6.89      |
| 247  | Ser        | polar    | h                              | 0.04                            | 0.285                    | 0.061     | N/A                                               | N/A       |
| 248  | Tyr        | polar    | h                              | -0.382                          | 0.218                    | 0.031     | N/A                                               | N/A       |
| 249  | Ala        | nonplar  | h                              | -0.954                          | 0.037                    | 0.007     | 5.85                                              | 9.71      |
| 250  | Gln        | polar    | h                              | -0.412                          | 0.067                    | 0.063     | 2.09                                              | 2.81      |
| 268  | His        | polar    | c                              | -0.953                          | 0.097                    | 0.011     | 4.00                                              | 7.95      |
| 269  | Pro        | nonpolar | c                              | -0.947                          | 0.001                    | 0         | N/A                                               | N/A       |
| 270  | Ser        | polar    | c                              | -0.955                          | 0.06                     | 0         | 5.36                                              | 12.76     |
| 271  | Pro        | nonpolar | c                              | -0.913                          | 0.273                    | 0         | N/A                                               | N/A       |
| 272  | Leu        | nonpolar | c                              | -0.682                          | 0.426                    | 0         | 1.45                                              | 8.16      |
| 273  | Ser        | polar    | c                              | -0.921                          | 0.159                    | 0         | 1.09                                              | 4.30      |
| 274  | Val        | nonpolar | c                              | -0.712                          | 0.09                     | 0         | 2.44                                              | 7.94      |

<sup>a</sup> h  $\equiv$  helical; c  $\equiv$  coil; s  $\equiv$  strand

<sup>b</sup> The lower conservation score indicates the functionally important amino acids on the protein surface which have slow evolution rates and was calculated through the web server <http://consurf.tau.ac.il/> based on the phylogenetic relations between its close sequence homologues.

<sup>c</sup> Depth index calculated using SADIC program and Gd<sup>3+</sup> probe size in the form of ProHance (3.5 Å).

<sup>d</sup> The ratios between the measured and predicted PRE values across the protein sequence for free hUNG and its complex with DNA.

## Supplementary References

- Hernández G.; Teng C-L; Bryant R. G.; LeMaster D. M. (2002) O<sub>2</sub> Penetration and Proton Burial Depth in Proteins: Applicability to Fold Family Recognition *J. Am. Chem. Soc* 124, 4463–4472.
- Iwahara, J.; Zweckstetter, M.; Clore, G. M. (2006) NMR structural and kinetic characterization of a homeodomain diffusing and hopping on nonspecific DNA, *Proc. Natl. Acad. Sci. USA*, 103, 15062–15067.
- Friedman, J. I.; Majumdar, A. and Stivers, J. T. (2009) Nontarget DNA binding shapes the dynamic landscape for enzymatic recognition of DNA damage, *Nucleic Acids Res* 2009, 37, 3493–3500.
- Varrazzo1, D.; Bernini, A.; Spiga O.; Ciutti, A.; Chiellini, S.; Venditti, V.; Bracci, L.; Niccolai, N. (2005) Three-dimensional computation of atom depth in complex molecular structures, *Bioinformatics*, 12, 2856–2860.
